# Supplementary material for: Organic nanoparticles composed of Fréchet-type dendrons: synthesis, characterization, self-assembly and reversible guest encapsulation
Source: Royal Society of Chemistry journal article supplement (doi:10.1039/c4tb00769g), 2014-01-01
Supplement: c4tb00769g1.pdf [file c4tb00769g1.pdf]

**Supporting Information  
For**

**Organic Nanoparticles Composed of Fréchet-type dendrons:  
Synthesis, Characterization, Self-assembly and Reversible  
Guest Encapsulation**

Sreedevi Krishnakumar and Karical R. Gopidas\*

*Photosciences and Photonics, Chemical Sciences and Technology Division, CSIR-  
National Institute for Interdisciplinary Science and Technology, Council of Scientific  
and Industrial Research (CSIR), Trivandrum 695 019, India*

| <b>Contents</b>                                                    | <b>Page</b> |
|--------------------------------------------------------------------|-------------|
| 1. TEM image of AuG <sub>1</sub>                                   | S2          |
| 2. Absorption spectra of AuG <sub>1</sub> and FDN                  | S2          |
| 3. Solubility of FDN in various solvents                           | S3          |
| 4. MALDI-TOF spectrum of FDN                                       | S3          |
| 5. EDX spectrum of FDN                                             | S4          |
| 6. DLS spectrum of FDN                                             | S4          |
| 7. XPS spectrum of FDN                                             | S5          |
| 8. <sup>1</sup> H NMR spectra of FDN                               | S5          |
| 9. <sup>13</sup> C and DEPT-135 <sup>13</sup> C NMR spectra of FDN | S6          |
| 10. IR Spectrum of FDN                                             | S6          |
| 11. Thermogram of FDN                                              | S7          |
| 12. DLS spectra of FDN at different concentrations                 | S8          |
| 13. TEM images of particles fusing through neck formation          | S9          |
| 14. DLS spectra indicating transformation of particle to fibre     | S9          |
| 15. Excitation and emission spectra of dye encapsulated FDNs.      | S10         |

## 1. TEM image of AuG<sub>1</sub>

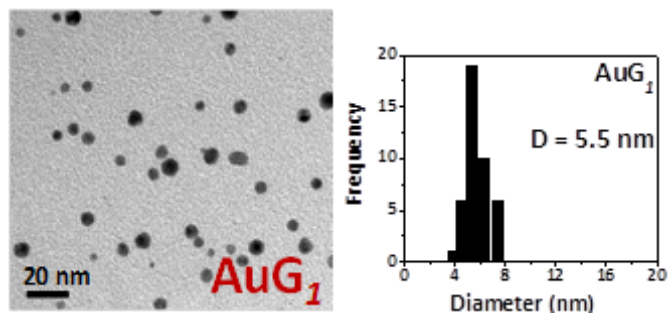

Fig. S1 TEM images of AuG<sub>1</sub>.

## 2. Absorption spectra of AuG<sub>1</sub> and FDN

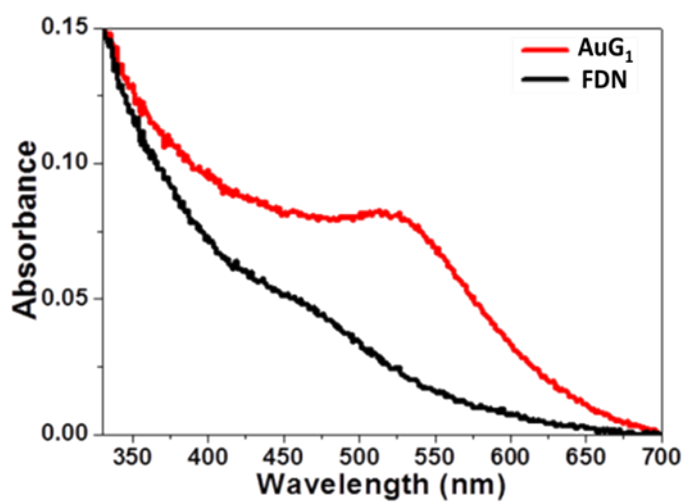

Fig. S2 Absorption spectra of AuG<sub>1</sub> and FDN.

### 3. Solubility of FDN in various solvents

| Solvent         | Solubility        |
|-----------------|-------------------|
| Cyclohexane     | Insoluble         |
| Hexane          | Insoluble         |
| Toluene         | Partially soluble |
| Tetrahydrofuran | soluble           |
| Chloroform      | soluble           |
| Dichloromethane | soluble           |
| Acetone         | Partially soluble |
| Acetonitrile    | Partially soluble |
| Alcohols        | Insoluble         |
| Ethers          | Insoluble         |

**Table ST1.** Solubility of FDN in various solvents.

### 4. MALDI-TOF spectrum of FDN

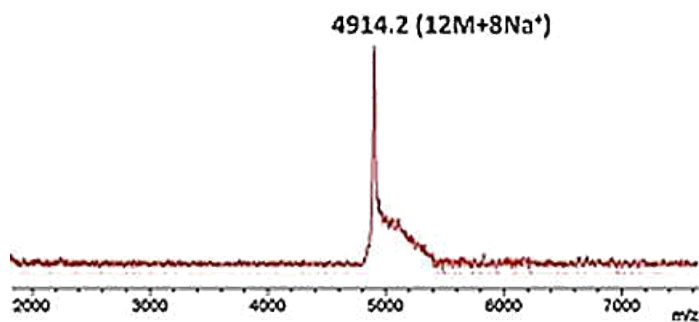

**Fig. S3** MALDI-TOF spectrum of FDN.

## 5. EDX spectrum of FDN

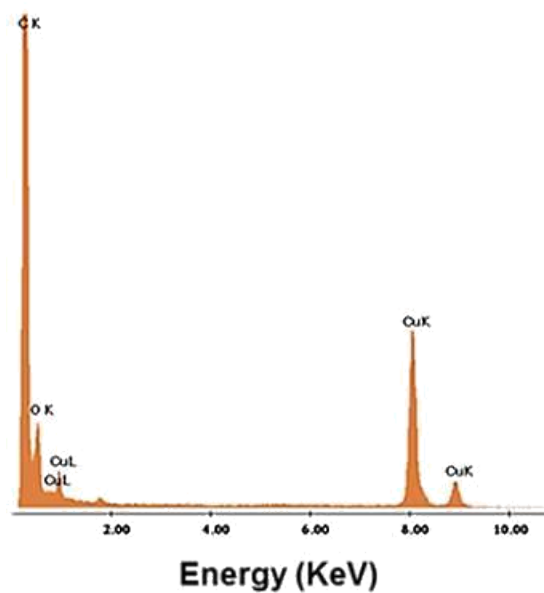

Fig. S4 EDX spectrum of FDN.

## 6. DLS spectrum of FDN

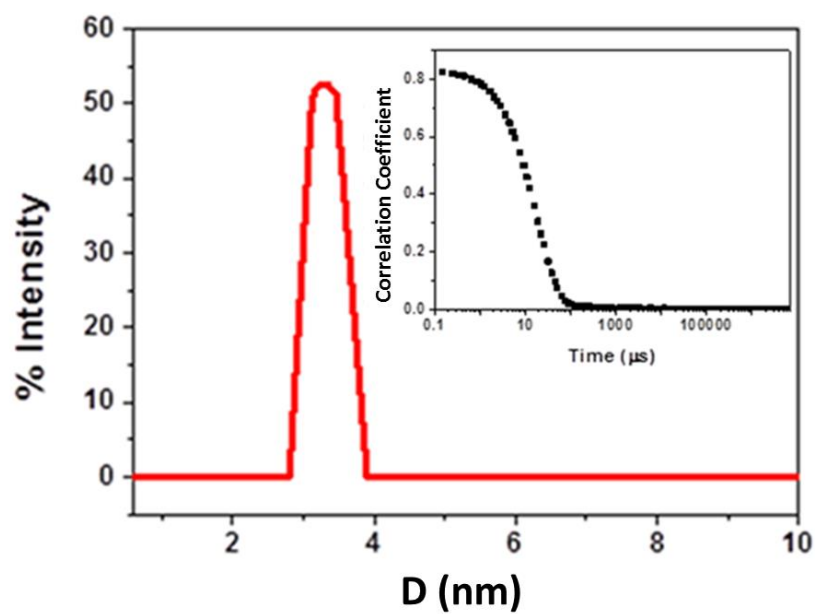

Fig. S5 DLS spectrum of FDN. The corresponding correlogram is shown in the inset.

## 7. XPS spectrum of FDN

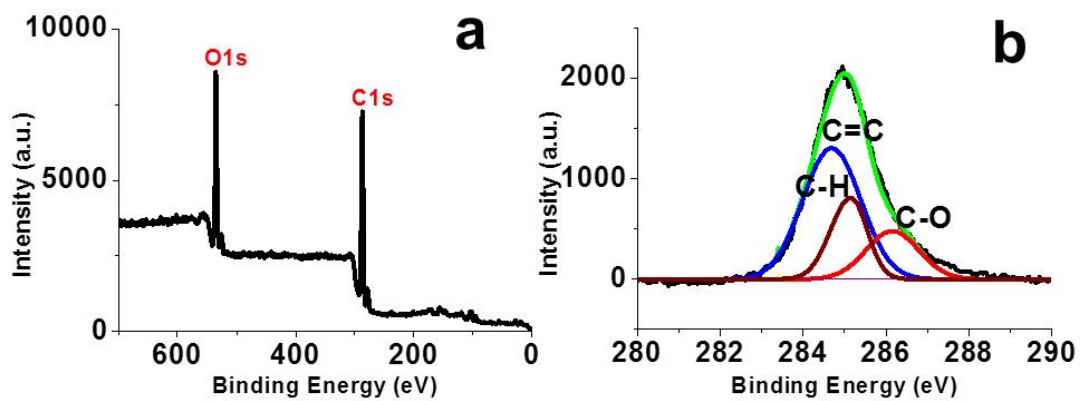

Fig. S6 (a) XPS survey spectrum of FDN and (b) C1s spectrum of FDN.

## 8. $^1\text{H}$ NMR spectrum of FDN

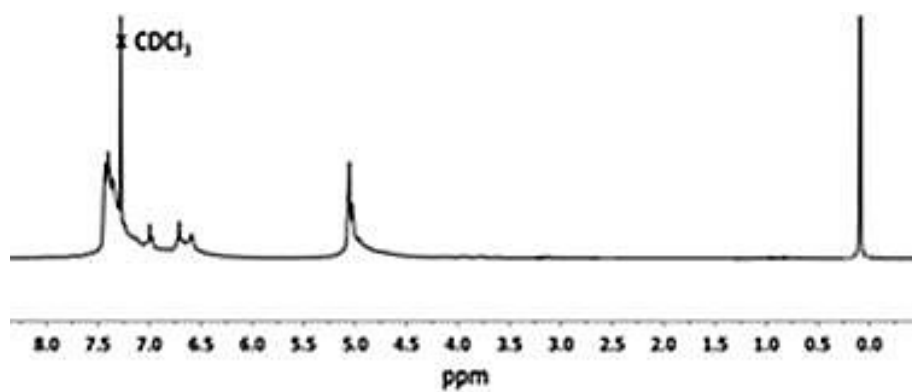

Fig. S7  $^1\text{H}$  NMR spectrum of FDN in  $\text{CDCl}_3$ .

## 9. $^{13}\text{C}$ and DEPT- $^{13}\text{C}$ NMR spectra of FDN

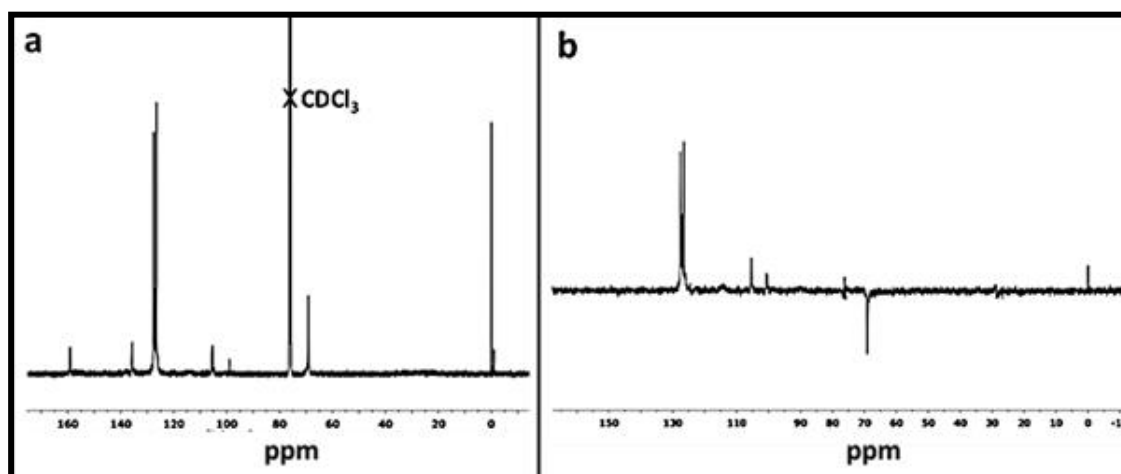

**Fig. S8** (a)  $^{13}\text{C}$  spectrum of FDN in  $\text{CDCl}_3$  and (b) DEPT - $^{13}\text{C}$  NMR spectrum of FDN in  $\text{CDCl}_3$ .

## 10. IR Spectrum of FDN

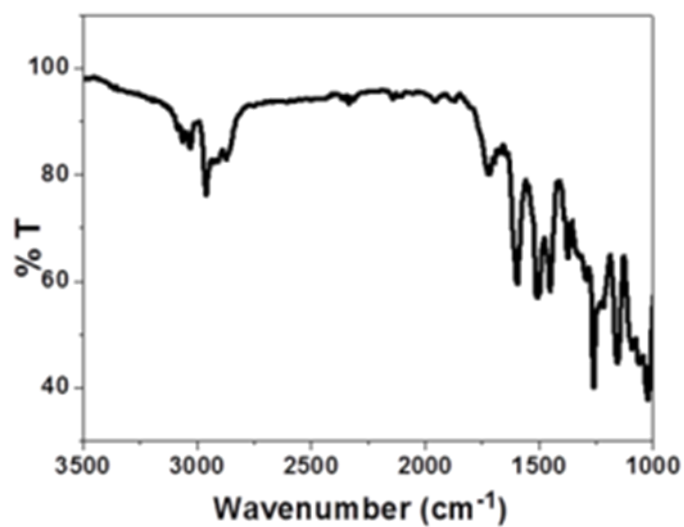

**Fig. S9** IR spectrum of FDN.

## 11. Thermogram of FDN

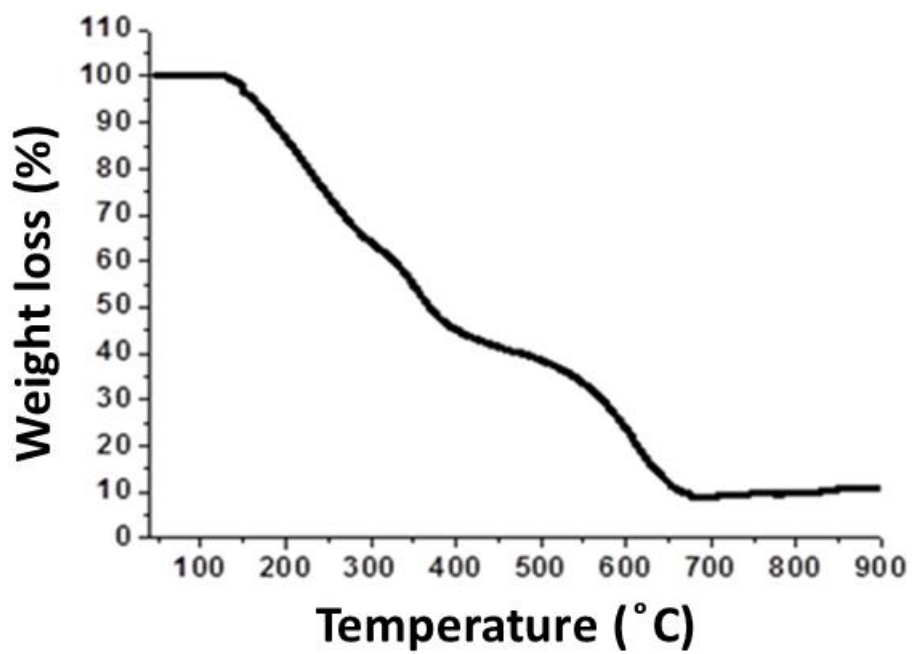

Fig. S10 Thermogram of FDN.

## 12. DLS spectra of FDN at different concentrations

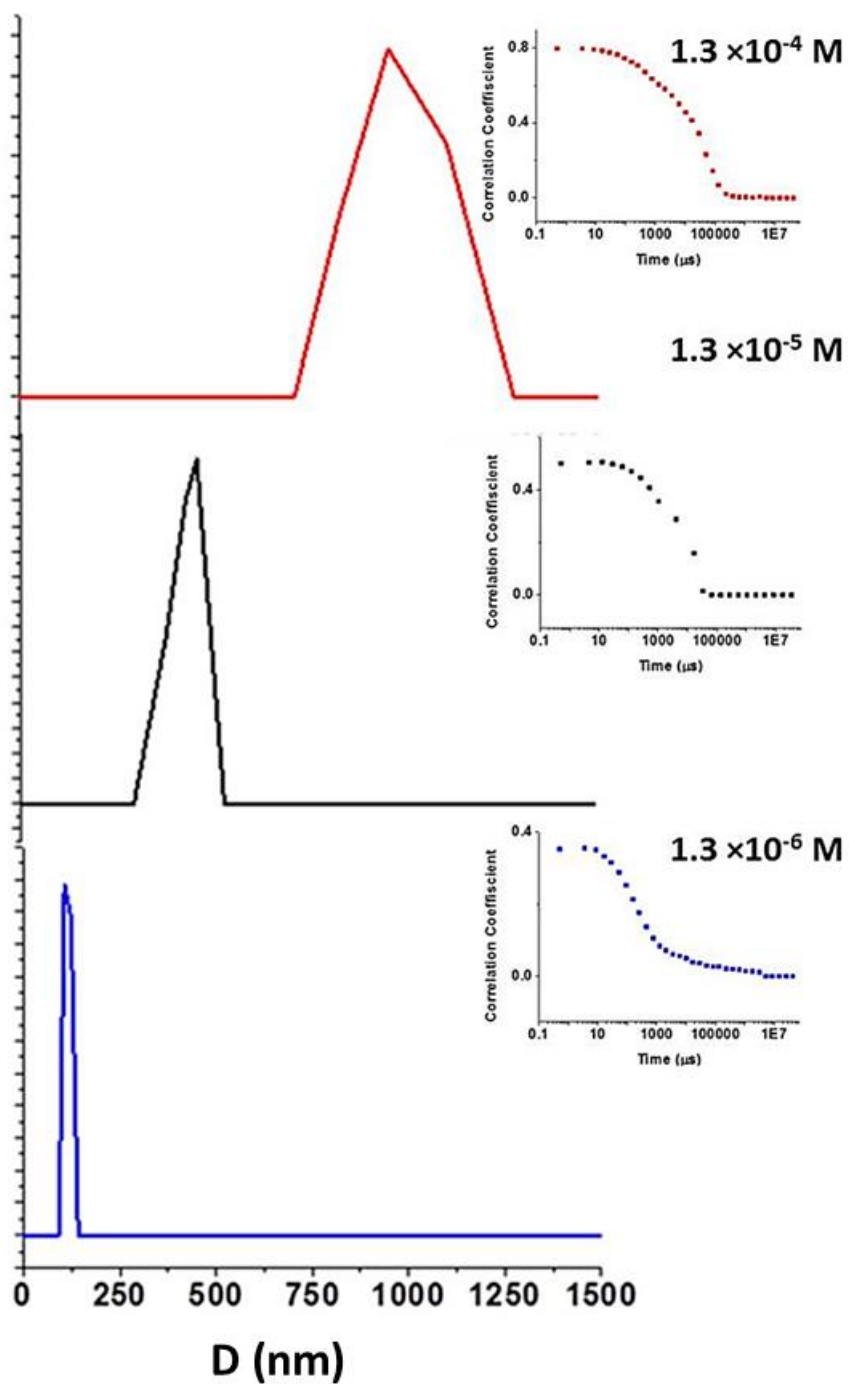

**Fig. S11** DLS spectra of FDN at different concentrations. The corresponding correlograms are shown in the inset.



### 13. TEM images of particles fusing through neck formation

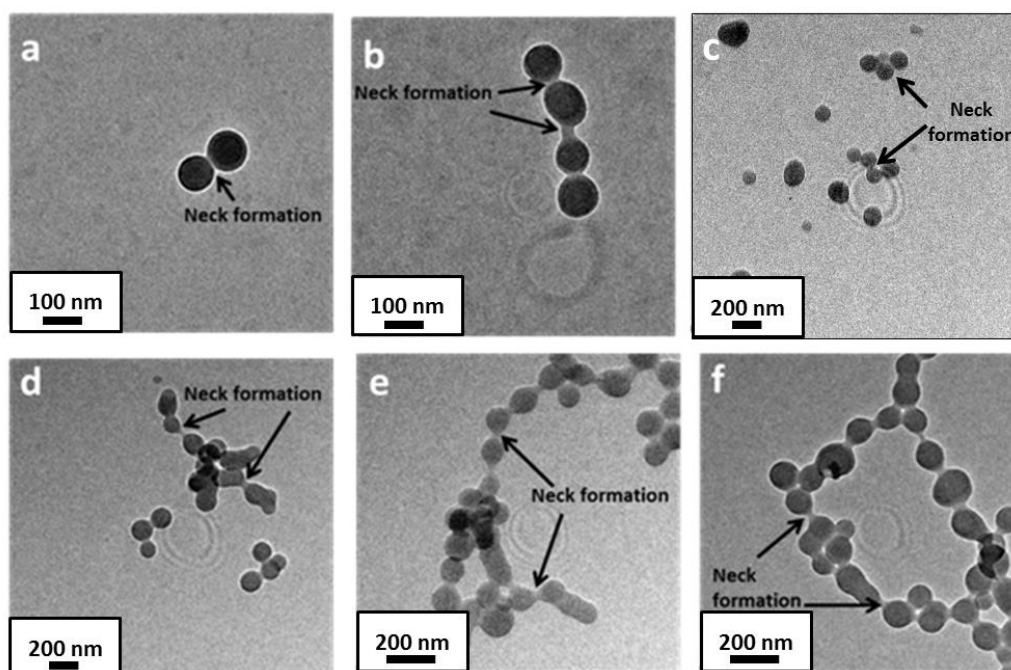

Fig. S12 TEM images of particles fusing through neck formation.

### 14. DLS spectra indicating transformation of particle to fibre

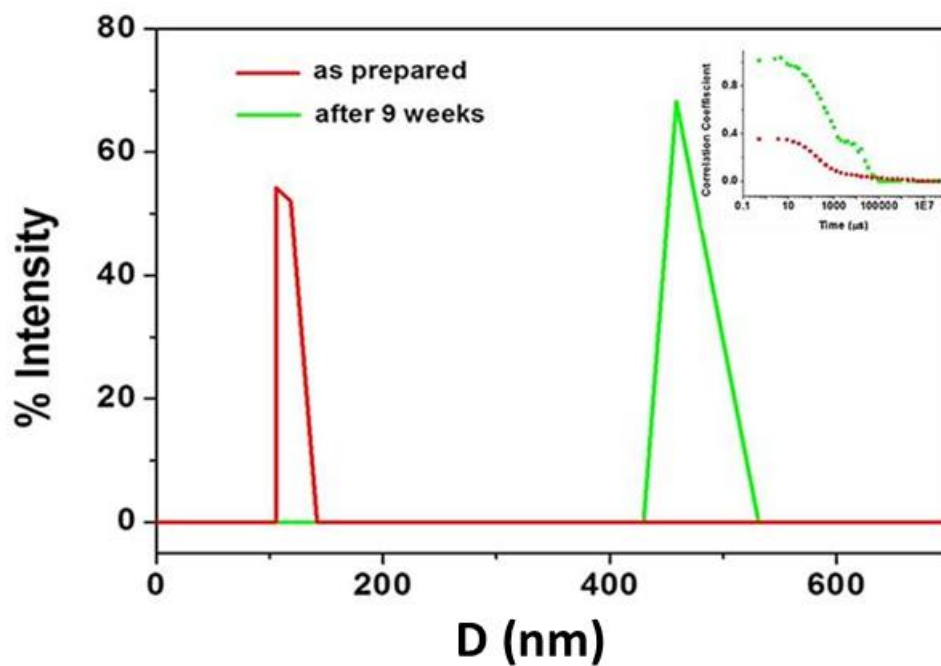

Fig. S13 DLS spectra of FDN at different time intervals ( $10^{-6}$  M concentration). The corresponding correlograms are shown in the inset.

## 15. Excitation and emission spectra of dye encapsulated FDNs

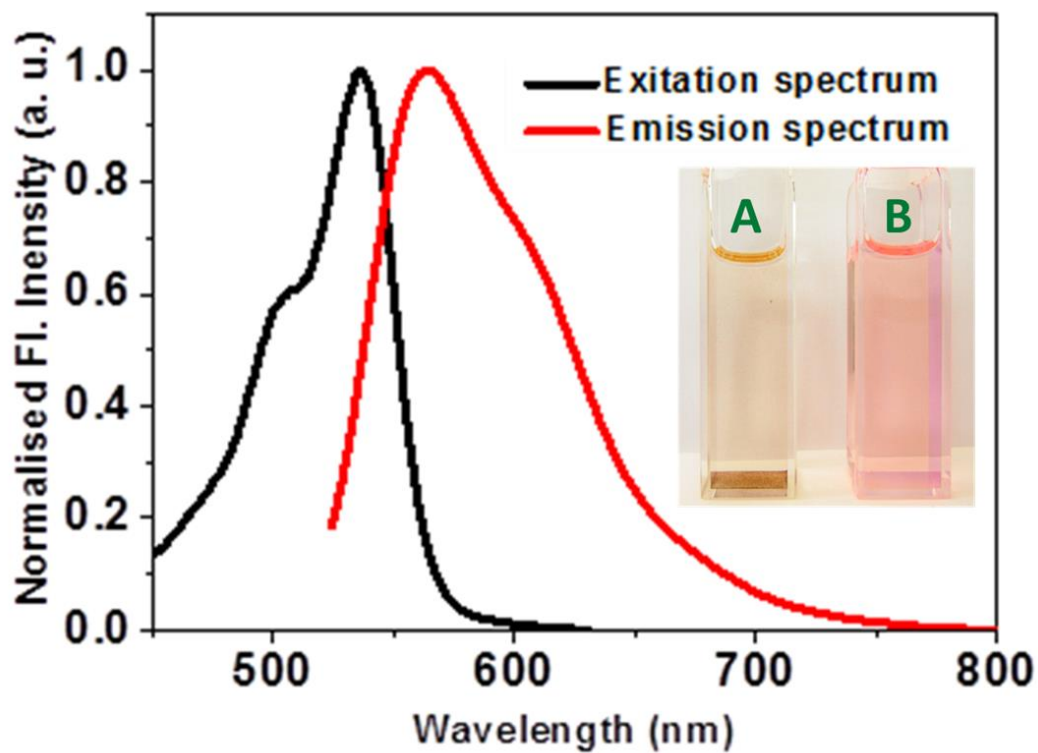

Fig. S14 Excitation and emission spectra of R6G encapsulated FDNs. Inset shows the photograph of toluene solution of FDN before (A) and after (B) dye encapsulation.
